# Supplementary material for: Rapid identification of human muscle disease with fibre optic Raman spectroscopy
Source: Royal Society of Chemistry journal article supplement (doi:10.1039/d1an01932e), 2022-01-01
Supplement: d1an01932e2.pdf [file d1an01932e2.pdf]

| MITOCHONDRIAL DISEASE |     |                                                                                                       |        |                                                 |                                    |                         |
|-----------------------|-----|-------------------------------------------------------------------------------------------------------|--------|-------------------------------------------------|------------------------------------|-------------------------|
| Gender                | Age | Clinical phenotype                                                                                    | Muscle | Biopsy findings                                 | Genotype                           | Muscle heteroplasmy (%) |
| F                     | 62y | Maternally inherited diabetes and deafness                                                            | TA     | 3% COX-deficient fibres, 1% ragged-red fibres   | m.3243A>G                          | 38                      |
| F                     | 29y | Mitochondrial encephalopathy, lactic acidosis, and stroke-like episodes                               | VL     | <1% COX-deficient fibres                        | m.3243A>G                          | 50                      |
| M                     | 31y | Asymptomatic                                                                                          | VL     | 4% COX-deficient fibres, 2% ragged-red fibres   | m.3243A>G                          | 63                      |
| F                     | 53y | Maternally inherited diabetes and deafness                                                            | TA     | 4% COX-deficient fibres, 2% ragged-red fibres   | m.3243A>G                          | 73                      |
| F                     | 55y | Maternally inherited diabetes and deafness, Left ventricular hypertrophy, GI dysmotility, Mild ataxia | TA     | 1% COX-deficient fibres                         | m.3243A>G                          | 84                      |
| M                     | 49y | Maternally inherited diabetes and deafness                                                            | TA     | 4% COX-deficient fibres, 2% ragged-red fibres   | m.3243A>G                          | 74                      |
| M                     | 44y | Subtle progressive external ophthalmoplegia, myopathy, exercise intolerance SNHL Glucose intolerance  | VL     | % COX-deficient fibres                          | m.3243A>G                          | 68                      |
| M                     | 29y | Progressive external ophthalmoplegia, ptosis, exercise intolerance                                    | TA     | 40% COX-deficient fibres, 20% ragged-red fibres | Single, large-scale mtDNA deletion | Not determined          |

|                                   |            |                                                                                                          |               |                                                               |                                                                                 |                                       |
|-----------------------------------|------------|----------------------------------------------------------------------------------------------------------|---------------|---------------------------------------------------------------|---------------------------------------------------------------------------------|---------------------------------------|
| F                                 | 45y        | Maternally inherited diabetes and deafness                                                               | TA            | 1% COX-deficient fibres                                       | m.3243A>G                                                                       | 37                                    |
| M                                 | 54y        | Mitochondrial encephalopathy, lactic acidosis, and stroke-like episodes                                  | TA            | 25% COX-deficient fibres, 10% ragged-red fibres               | m.3243A>G                                                                       | 64                                    |
| M                                 | 58y        | Myoclonic epilepsy with ragged red fibres. Patient 6 in <sup>1</sup>                                     | TA            | 30% COX-deficient fibres, 8% ragged-red fibres                | m.8344A>G                                                                       | 90                                    |
| M                                 | 80y        | Progressive external ophthalmoplegia, ptosis, generalised myopathy. Patient 10 in <sup>2</sup>           | TA            | 20% COX-deficient fibres, 5% ragged-red fibres                | Recessive <i>POLG</i> variants (p.Ala467Thr; p.Thr251Ile/p.Pro587Leu)           | N/A                                   |
| M                                 | 56y        | Progressive external ophthalmoplegia, ptosis, peripheral neuropathy, epilepsy. Patient 5 in <sup>3</sup> | TA            | 17% COX-deficient fibres, 8% ragged-red fibres                | Recessive <i>POLG</i> variants (p.Trp748Ser; p.Arg1096Cys)                      | N/A                                   |
| F                                 | 64y        | Ptosis, peripheral neuropathy, ataxia                                                                    | Delt          | 15% COX-deficient fibres, 4% ragged-red fibres                | Recessive <i>POLG</i> variants c.2542G>A p.(Gly848Ser); c.2799T>G p.(Ser933Arg) | N/A                                   |
| <b>NON-MITOCHONDRIAL MYOPATHY</b> |            |                                                                                                          |               |                                                               |                                                                                 |                                       |
| <b>Gender</b>                     | <b>Age</b> | <b>Clinical phenotype</b>                                                                                | <b>Muscle</b> | <b>Main biopsy findings</b>                                   | <b>Other investigation results</b>                                              | <b>Clinico-pathological diagnosis</b> |
| M                                 | 45y        | Proximal upper and lower limb weakness. Chronic renal failure (known cause), on dialysis                 | Biceps        | Type II fibre atrophy, few moth eaten fibres on NADH staining | -                                                                               | Metabolic (uraemic) myopathy          |

|   |     |                                                |         |                                                                                                                                                                                                                                    |                                                                                                                                                  |                                                                                         |
|---|-----|------------------------------------------------|---------|------------------------------------------------------------------------------------------------------------------------------------------------------------------------------------------------------------------------------------|--------------------------------------------------------------------------------------------------------------------------------------------------|-----------------------------------------------------------------------------------------|
| F | 69y | Proximal upper limb weakness                   | Deltoid | Excess of type I fibres, few moth eaten fibres on NADH staining. Fat deposition between muscle fibres. <1% COX deficient fibres                                                                                                    | CK 87                                                                                                                                            | Myopathy: unknown aetiology                                                             |
| F | 61y | Proximal muscle weakness, fatigue, muscle pain | Deltoid | Excess of type I fibres                                                                                                                                                                                                            | CK 62, weak anti-nuclear antibody positive. Extractable nuclear antigen and myositis antibody negative                                           | Myopathy: unknown aetiology                                                             |
| M | 73y | Proximal upper and lower limb weakness         | Quads   | Some central loss of NADH staining, occasional coarse architecture to fibres.                                                                                                                                                      | CK 62<br>Sensorimotor axonal neuropathy                                                                                                          | Myopathy: unknown aetiology                                                             |
| M | 59y | Lower limb weakness, muscle hypertrophy        | Quads   | Scattered atrophic fibres, mainly type II. Excess nuclear internalisation. No lipid or glycogen. Necrotic fibres seen with association with macrophages. MHC class I upregulation. No inflammatory cells.                          | Anti-voltage gated potassium channel positive.<br><br>CASPR-2, LGI-1 negative.<br><br>Extractable nuclear antigen and myositis antibody negative | Subacute idiopathic inflammatory myopathy<br><br>(Immune mediated necrotising myopathy) |
| M | 39y | Proximal leg weakness                          | Quads   | Type I fibre predominance, variation in fibre size. Excess nuclear internalisation. Marked inflammation, presumed to be secondary to dystrophic process. Marked fibre splitting. Connective tissue expansion and fatty replacement | CK 284.<br>FHL1 gene negative                                                                                                                    | Dystrophic myopathy<br><br>(Unclassified limb girdle muscular dystrophy)                |

|   |     |                                                                               |         |                                                                                                                                                                                                                                                       |                                                                                    |                                                         |
|---|-----|-------------------------------------------------------------------------------|---------|-------------------------------------------------------------------------------------------------------------------------------------------------------------------------------------------------------------------------------------------------------|------------------------------------------------------------------------------------|---------------------------------------------------------|
|   |     |                                                                               |         | of myocytes.                                                                                                                                                                                                                                          |                                                                                    |                                                         |
| M | 56y | Proximal lower limb weakness, muscle pain.                                    | Quads   | Lymphocytic infiltration. MHC-1 upregulation. COX negative fibres.                                                                                                                                                                                    |                                                                                    | Inclusion body myositis                                 |
| M | 56y | Leg weakness, then arm weakness. Dysarthria, dysphagia                        | Deltoid | Scattered atrophic fibres, some fibre splitting and fragmentation. Excessive nuclear internalisation. Moth-eaten fibres on MADH staining. Normal IHC for dystrophins 1-3, sarcoglycans, emerin, dysferlin and caveolin-3.                             | CK 444                                                                             | Dystrophic myopathy                                     |
| M | 64y | Proximal leg weakness                                                         | Deltoid | Slight excess of nuclear internalisation. No lipid or glycogen accumulation. No necrosis. Subsarcolemmal accentuation on NADH and trichrome stains. Subsarcolemmal accumulations of mitochondria on EM, no COX negative fibres, no red ragged fibres. | CK 63                                                                              | Myopathy: unknown aetiology                             |
| M | 22y | Proximal weakness, facial weakness, long finger flexor and elbow contractures | Quads   | Significant variation in fibre size. Necrotic fibres seen. Increased internal nuclei. Fibre splitting and                                                                                                                                             | CK 901. LMNA, VCP, MYH7, collagen 6 and 12, STIM1, ORA1, FSHD1 and 2 all negative. | Dystrophic myopathy<br>(Limb girdle muscular dystrophy) |

|                          |            |                                                                  |               |                                                                                                                                                          |                                                                                             |                                                                              |
|--------------------------|------------|------------------------------------------------------------------|---------------|----------------------------------------------------------------------------------------------------------------------------------------------------------|---------------------------------------------------------------------------------------------|------------------------------------------------------------------------------|
|                          |            |                                                                  |               | hypertrophy. Lipid and glycogen normal. Dysferrlin reduced.                                                                                              | 100,000 genome negative                                                                     |                                                                              |
| F                        | 25y        | Proximal upper and lower limb weakness                           | Quads         | Non-specific myopathic changes. Fibre size variation, excess nuclear internalisation and slight excess endomysial collagen                               | Positive anti-SRP                                                                           | Subacute idiopathic inflammatory myopathy<br><br>(Anti-SRP related myopathy) |
| F                        | 35y        | Hand grip weakness and proximal lower limb weakness              | Biceps        | Patchy core-like areas of lost NADH reactivity.                                                                                                          | CK 91.<br>Heterozygous change in TTN gene (c.7304T>G, p.(Tyr24349                           | Dystrophic myopathy<br><br>(TTN myopathy)                                    |
| M                        | 72y        | Longstanding upper limb weakness, late onset lower limb weakness | Deltoid       | Increased variation in fibre size - atrophic and hypertrophic. Increased nuclear internalisation. No excess lipid of glycogen. Chronic myopathic process | CK 217                                                                                      | Myopathy: unknown aetiology                                                  |
| <b>NO MUSCLE DISEASE</b> |            |                                                                  |               |                                                                                                                                                          |                                                                                             |                                                                              |
| <b>Gender</b>            | <b>Age</b> | <b>Clinical phenotype</b>                                        | <b>Muscle</b> | <b>Main biopsy findings</b>                                                                                                                              | <b>Other investing. results</b>                                                             | <b>Clinico-pathological diagnosis</b>                                        |
| F                        | 61         | Cognitive decline, deaf.                                         | Quads         | <2% COX negative fibres. Age-related changes.                                                                                                            | Subcortical WM changes on MRI                                                               | Vascular dementia                                                            |
| F                        | 80y        | Ataxia, myoclonus                                                | Deltoid       | Some type II fibre atrophy. 2% COX deficient fibres, <1% red ragged fibres. Likely age-related changes. Some evidence of low-level                       | No evidence of m.324a>G, MTTL1 pathogenic variant, no pathogenic mitochondrial DNA mutation | Ataxia of uncertain cause                                                    |

|   |     |                                                                |         |                                                                                  |                                                                                                                               |                                                          |
|---|-----|----------------------------------------------------------------|---------|----------------------------------------------------------------------------------|-------------------------------------------------------------------------------------------------------------------------------|----------------------------------------------------------|
|   |     |                                                                |         | mitochondrial DNA re-arrangements, felt unlikely to be responsible for symptoms. | associated with NARP/MILS, no mitochondrial DNA variance associated with the MERRF phenotype.                                 |                                                          |
| F | 59y | Occasional dysphagia & ptosis, leg pain                        | Quads   | Very few atrophic fibres (of both fibre types), otherwise normal.                | CK 113. Anti-AChR antibody negative.                                                                                          | Levator palpebrae dehiscence, L4/5 spinal canal stenosis |
| M | 77y | Proximal weakness                                              | Deltoid | Very few red ragged and COX negative fibres, thought to be age-related.          | CK 97. Anti-AChR antibody positive                                                                                            | Myaesthesia gravis + osteoarthritis                      |
| M | 23y | Myalgia                                                        | Quads   | Normal                                                                           | CK 362                                                                                                                        | Fibromyalgia                                             |
| F | 42y | Falls, ataxia                                                  | Deltoid | Normal                                                                           | Anti-GAD negative. ANA and ENA negative. Coeliac screen negative                                                              | Ataxia of uncertain cause                                |
| M | 33y | Renal angle pain one week following general anaesthetic.       | Biceps  | Normal                                                                           | CK 23,000                                                                                                                     | Malignant hyperthermia                                   |
| F | 40y | Sensory ataxia comprising patchy numbness and loss of balance. | Deltoid | Normal                                                                           | CK 43. Anti-TTG antibodies positive+. Nerve conduction studies – asymmetric, non-length dependent sensory nerve abnormalities | Coeliac disease-related sensory ganglionopathy           |

|   |     |                                                             |         |                                                                                                                                                                          |                                                                                                  |                                  |
|---|-----|-------------------------------------------------------------|---------|--------------------------------------------------------------------------------------------------------------------------------------------------------------------------|--------------------------------------------------------------------------------------------------|----------------------------------|
| M | 64y | Incidentally raised CK                                      | Quads   | Normal                                                                                                                                                                   | CK 800. Myositis antibodies and HMGCo-A reductase negative.                                      | Statin related hyper CK-aemia    |
| F | 74  | Late onset cerebellar ataxia, deafness and myoclonus. Falls | Deltoid | Few atrophic type II fibres, <1% cox negative. No lipid/glycogen accumulation. No mitochondrial DNA abnormalities                                                        | Positive IgG anti-TG6 antibodies                                                                 | Gluten related cerebellar ataxia |
| M | 71  | Ataxia and dysarthria                                       | Deltoid | Atrophic type II fibres. 2% COX negative fibres. Rare red ragged fibres. Non-specific mitochondrial appearances.                                                         | Positive IgG anti-TG6 antibodies                                                                 | Gluten-related cerebellar ataxia |
| F | 61y | Ataxia, nystagmus                                           | Deltoid | Increased variation in fibre size due to atrophic type II fibres. No group atrophy. Normal mosaic pattern of fibre type distribution. Sparse COX negative fibres (0.1%). | ANA, coeliac, monoclones, melas/merrf/nar p genetics all negative. Ataxia genetic panel negative | Ataxia, uncertain aetiology      |
| M | 77y | Ataxia                                                      | Deltoid | Sparse COX negative fibres (<0.5%). Otherwise normal                                                                                                                     | Ataxia genetics negative                                                                         | Ataxia of uncertain aetiology    |
| F | 59y | Ataxia, epilepsy, deafness                                  | Biceps  | Sparse COX negative fibres (<1%). Otherwise normal. Mitochondrial DNA sequencing normal.                                                                                 | Ataxia genetics negative                                                                         | Ataxia of uncertain aetiology    |

|   |     |                                                                                       |         |                                                                                                                                                           |                                                                                              |                                                                                              |
|---|-----|---------------------------------------------------------------------------------------|---------|-----------------------------------------------------------------------------------------------------------------------------------------------------------|----------------------------------------------------------------------------------------------|----------------------------------------------------------------------------------------------|
| F | 37y | Learning difficulties, deaf, epilepsy, ataxia                                         | Deltoid | Areas of staining loss with both NADHTR and COX/SDH preparations; considered non-specific finding. Normal EM.                                             | CK 117 Ataxia genetic panel negative. SCA 1/2/3/6/7 and Friedrich's ataxia genetics negative | Likely genetic disorder, no cause found                                                      |
| F | 54y | Lower limb weakness and pain. 3 <sup>rd</sup> nerve palsy.                            | Biceps  | Mild type II atrophy only, otherwise normal                                                                                                               | Sensorimotor neuropathy                                                                      | Diabetes related neuropathy and 3 <sup>rd</sup> nerve palsy                                  |
| F | 31y | Leg spasms, back pain, nausea. Hiatus hernia, gastrotomy and gastric dumping syndrome | Biceps  | MHC1 upregulation of sarcolemmal membrane staining. Very occasional perivascular aggregates of inflammatory cells. No morphological evidence of myopathy. | CK 75. HSP genetics negative                                                                 | Repeated IM injections of cyclizine for refractory nausea causing inflammation and fibrosis. |

**Supplementary table 1. Clinico-pathological characteristics of the patients.**

M – male, F – female, Y – years, COX – cytochrome C oxidase, CK – creatine kinase, NADH - Nicotinamide adenine dinucleotide-hydrogen (reduced form of NADH), Quads – quadriceps muscle, CASPR-2 – Contactin associated protein red-2, LGI-1 - Leucine-rich glioma-inactivated 1 antibody, MERRF – Myoclonic epilepsy with ragged red fibres; MHC1 – major histocompatibility complex-1; MILS - Maternally Inherited Leigh Syndrome ; MTTL1 - Mitochondrially encoded tRNA leucine 1; NARP - neurogenic muscle weakness, ataxia, and retinitis pigmentosa; SRP – signal recognition particle; AChR – acetylcholine receptor; TTG – tissue transglutaminase; HMGB-CoA -  $\beta$ -Hydroxy  $\beta$ -methylglutaryl-CoA; SCA – spinocerebellar ataxia; HSP – hereditary spastic paraparesis.
